# Supplementary material
Source: Springer Nature journal article supplement (https://www.springermedizin.de/resource/supplementary/12879_2011_2136_MOESM6_ESM.pdf/9443720)
Supplement: MOESM6 [file 9443720]

Table 5: distribution of A2694T PfATPase 6 polymorphism in drug sensitive groups

| Drug | Profils                                      | n  | Strains with polymorphism PfATPase 6 A2694T |           |           |      |
|------|----------------------------------------------|----|---------------------------------------------|-----------|-----------|------|
|      |                                              |    | A                                           | T         | MIX       | p    |
| CQ   | Resistant (IC50>100 nM)                      | 20 | 14 (70.0%)                                  | 5 (25.0%) | 1 (5.0%)  | 0.45 |
|      | Sensitive (IC50<100 nM)                      | 26 | 20 (76.9%)                                  | 5 (19.2%) | 1 (3.8%)  |      |
| MDAQ | Resistant (IC50 ≥ 60 nM)                     | 24 | 17 (69.2%)                                  | 6 (26.9%) | 1 (3.8%)  | 0.6  |
|      | Sensitive (IC50 < 60 nM)                     | 22 | 17 (80.0%)                                  | 4 (15.0%) | 1 (5.0%)  |      |
| MF   | Resistant (IC50>20 nM)                       | 11 | 7 (63.6%)                                   | 3 (27.3%) | 1 (9.1%)  | 0.4  |
|      | Sensitive (IC50<20 nM)                       | 35 | 27 (77.1%)                                  | 7 (20.0%) | 1 (2.9%)  |      |
| DHA  | <b>Reduced</b> susceptibility (IC50 ≥ 10 nM) | 11 | 8 (72.7%)                                   | 3 (27.3%) | 0 (0.0%)  | 0.4  |
|      | Sensitive (IC50<10 nM)                       | 35 | 26 (74.3%)                                  | 7 (20.0%) | 2 (5.71%) |      |
